# Supplementary material
Source: Springer Nature journal article supplement (https://www.springermedizin.de/resource/supplementary/12885_2005_367_MOESM3_ESM.pdf/9469630)

**A****EFFECTS OF DOCETAXEL  
ON SC TUMOR GROWTH**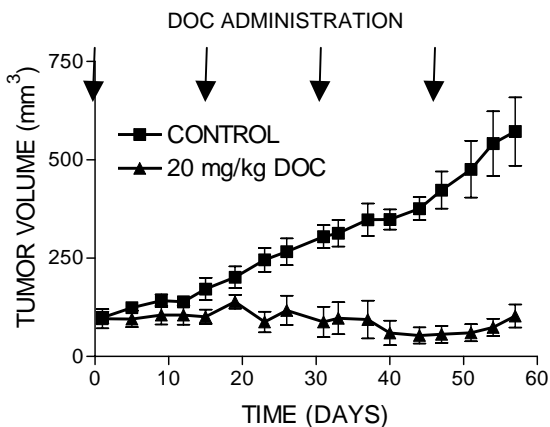**B****EFFECTS OF DOCETAXEL  
ON SERUM PSA**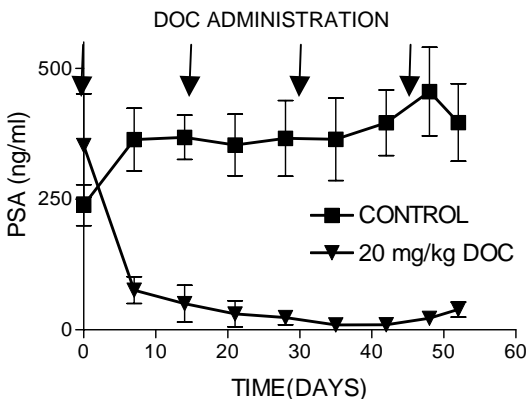

Supplement: MOESM3 [file 9469630]
